# Supplementary material for: Clonal Expansion in Multiple Phyllosticta Species Causing Citrus Black Spot or Similar Symptoms in China
Source: MDPI journal article supplement (doi:10.3390/jof9040449), 2023-04-06
Supplement: s1 [file s1]

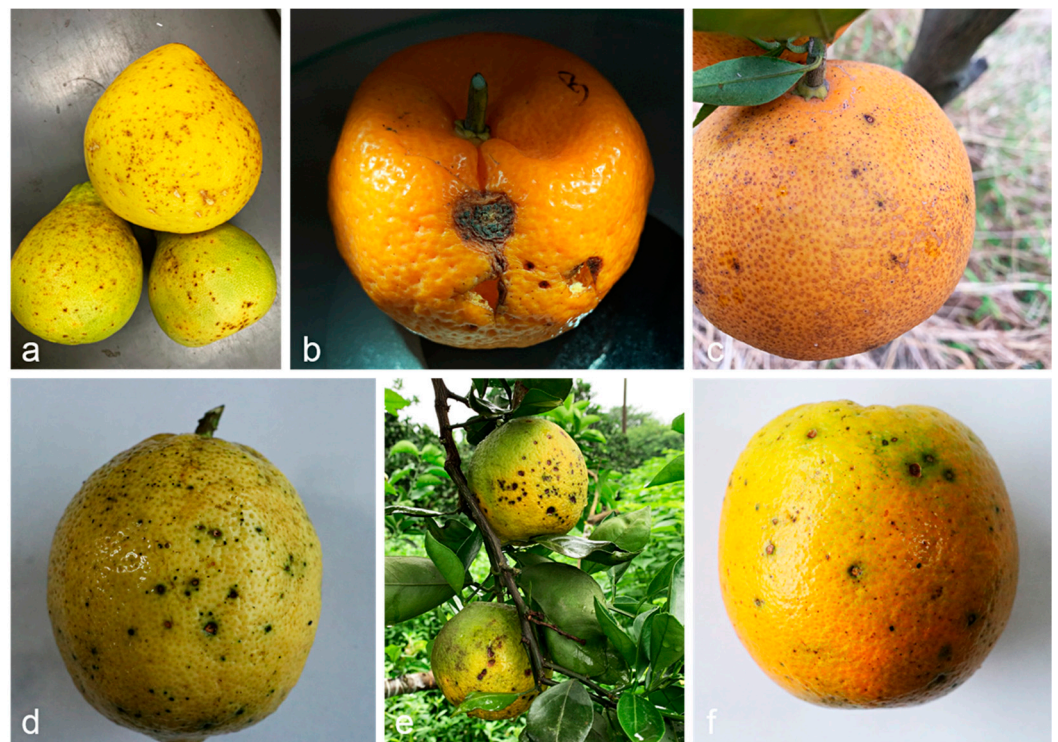

**Figure S1** Symptoms of citrus fruit spots from which the *Phyllosticta* isolates were obtained. a *C. maxima* fruits, b *C. reticulata* cv. Nangfengmiju, c *C. reticulata* cv. Unshiu, d *C. limon*, e *C. sinensis* cv. Navel, f *C. sinensis* cv. Valencia.

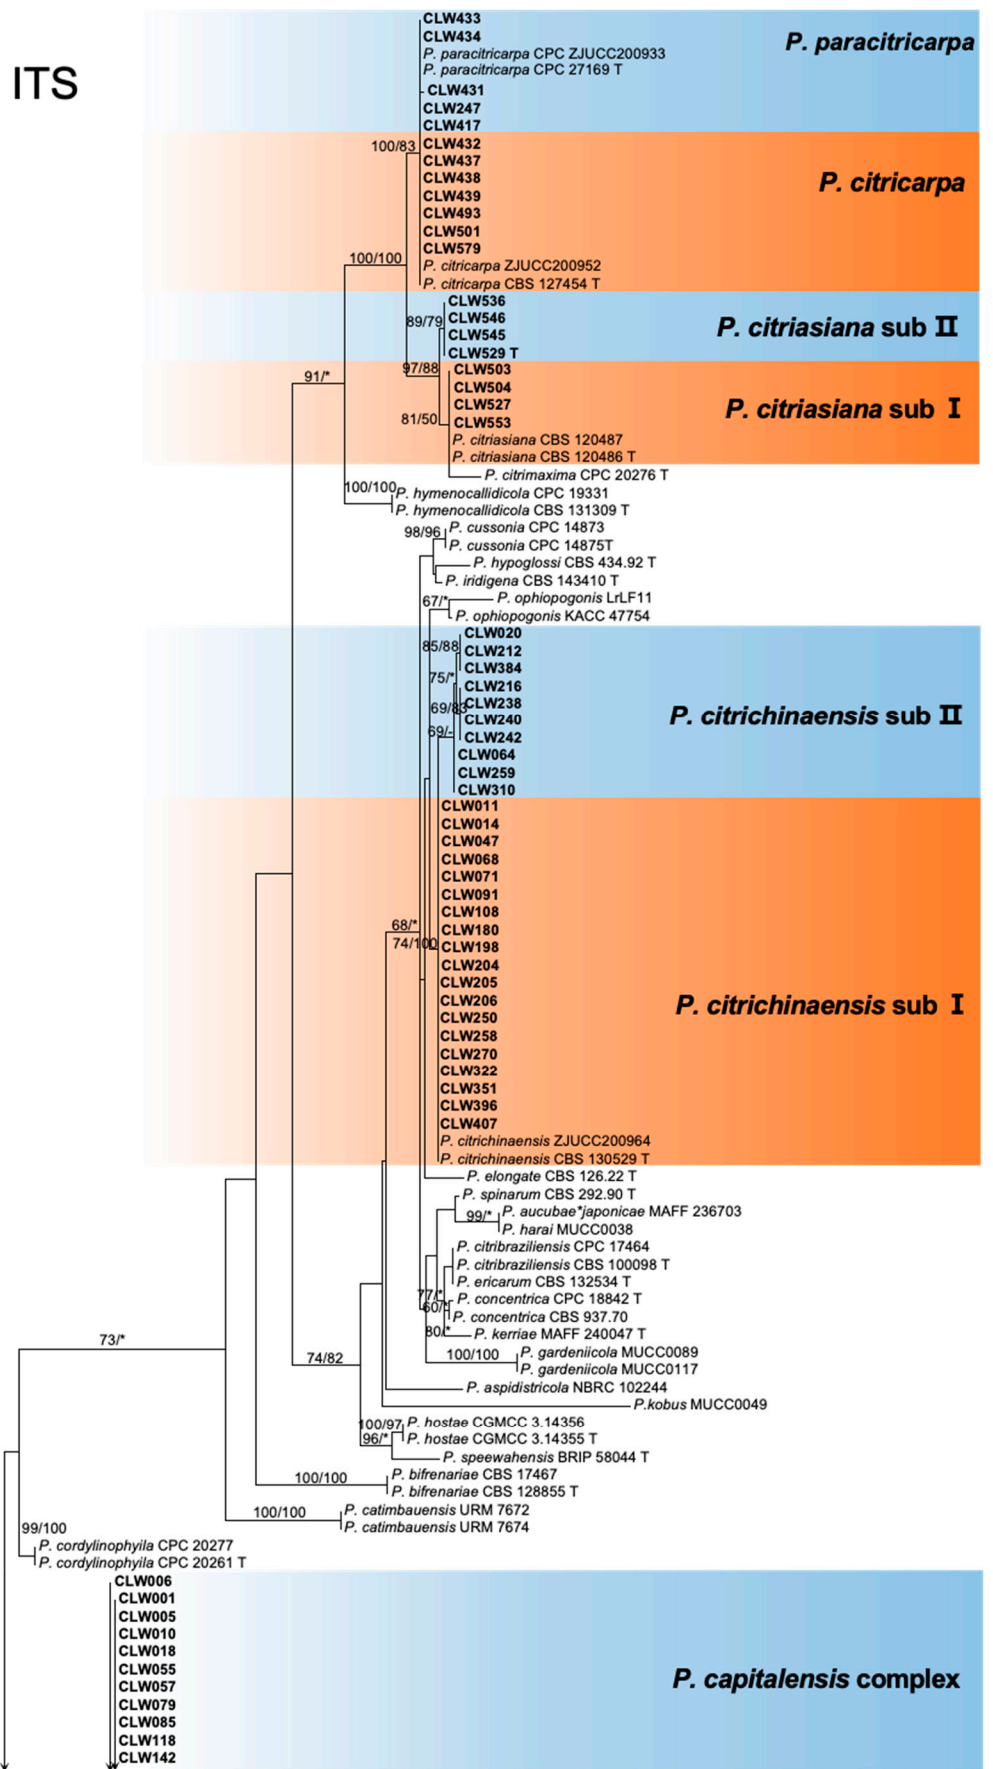

Next page continue.

Continue

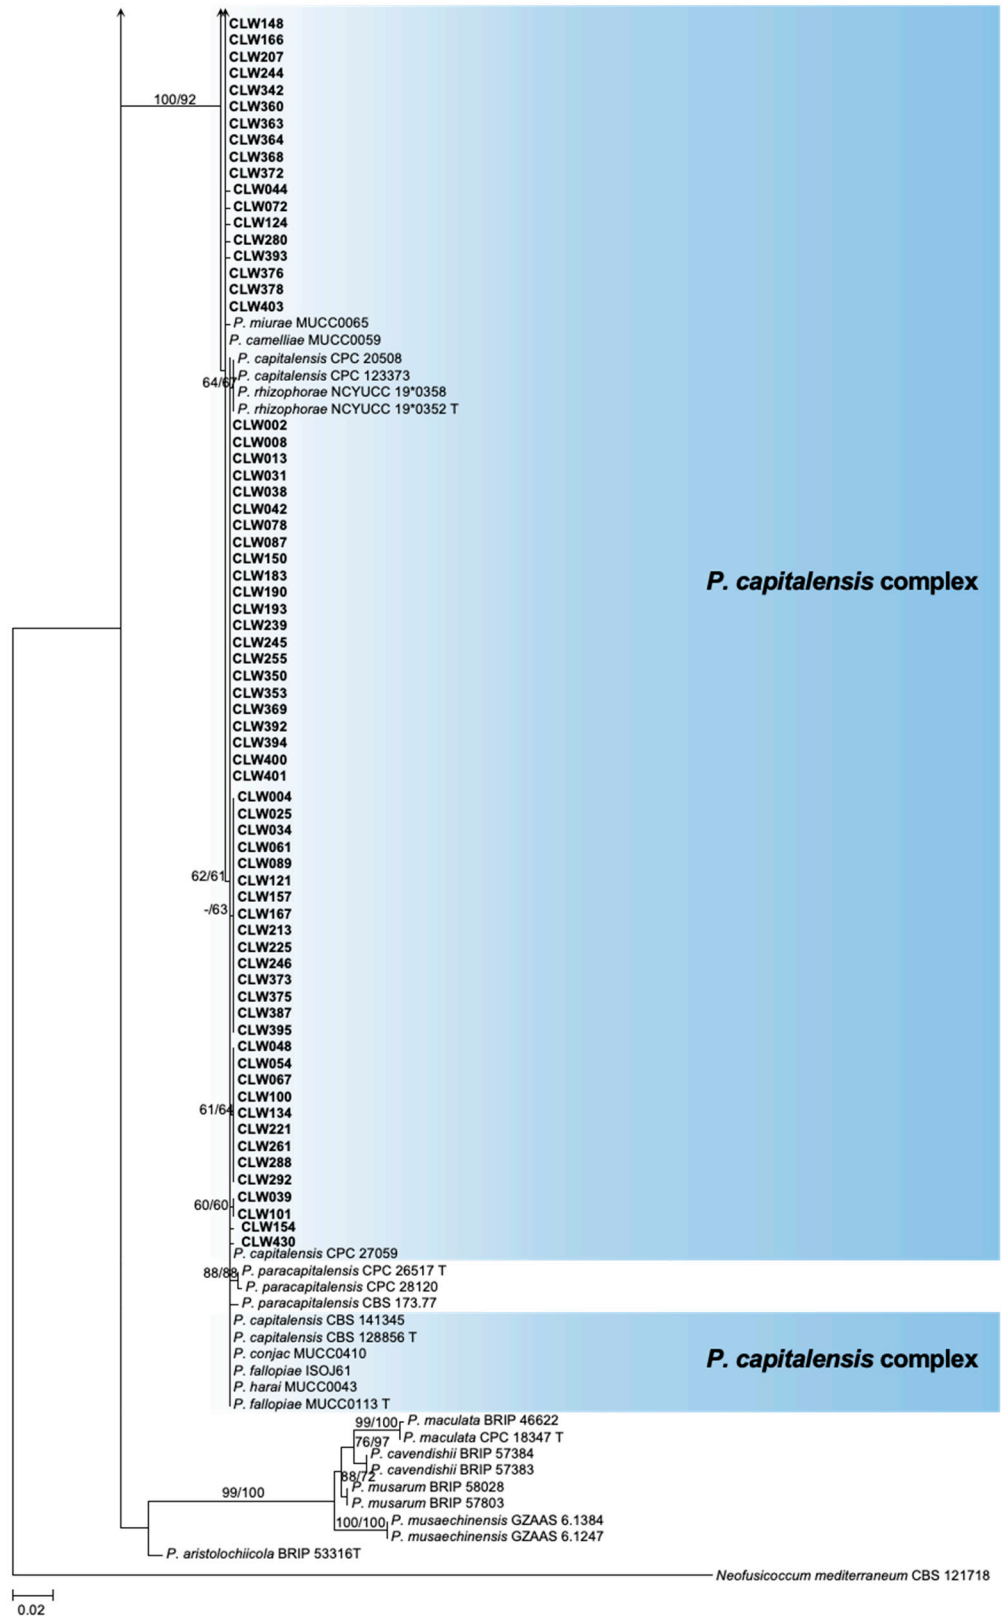

**Figure S2.** Maximum likelihood phylogeny of *Phyllostica* isolates related to citrus. 194 isolates of ITS tree.

*actA*

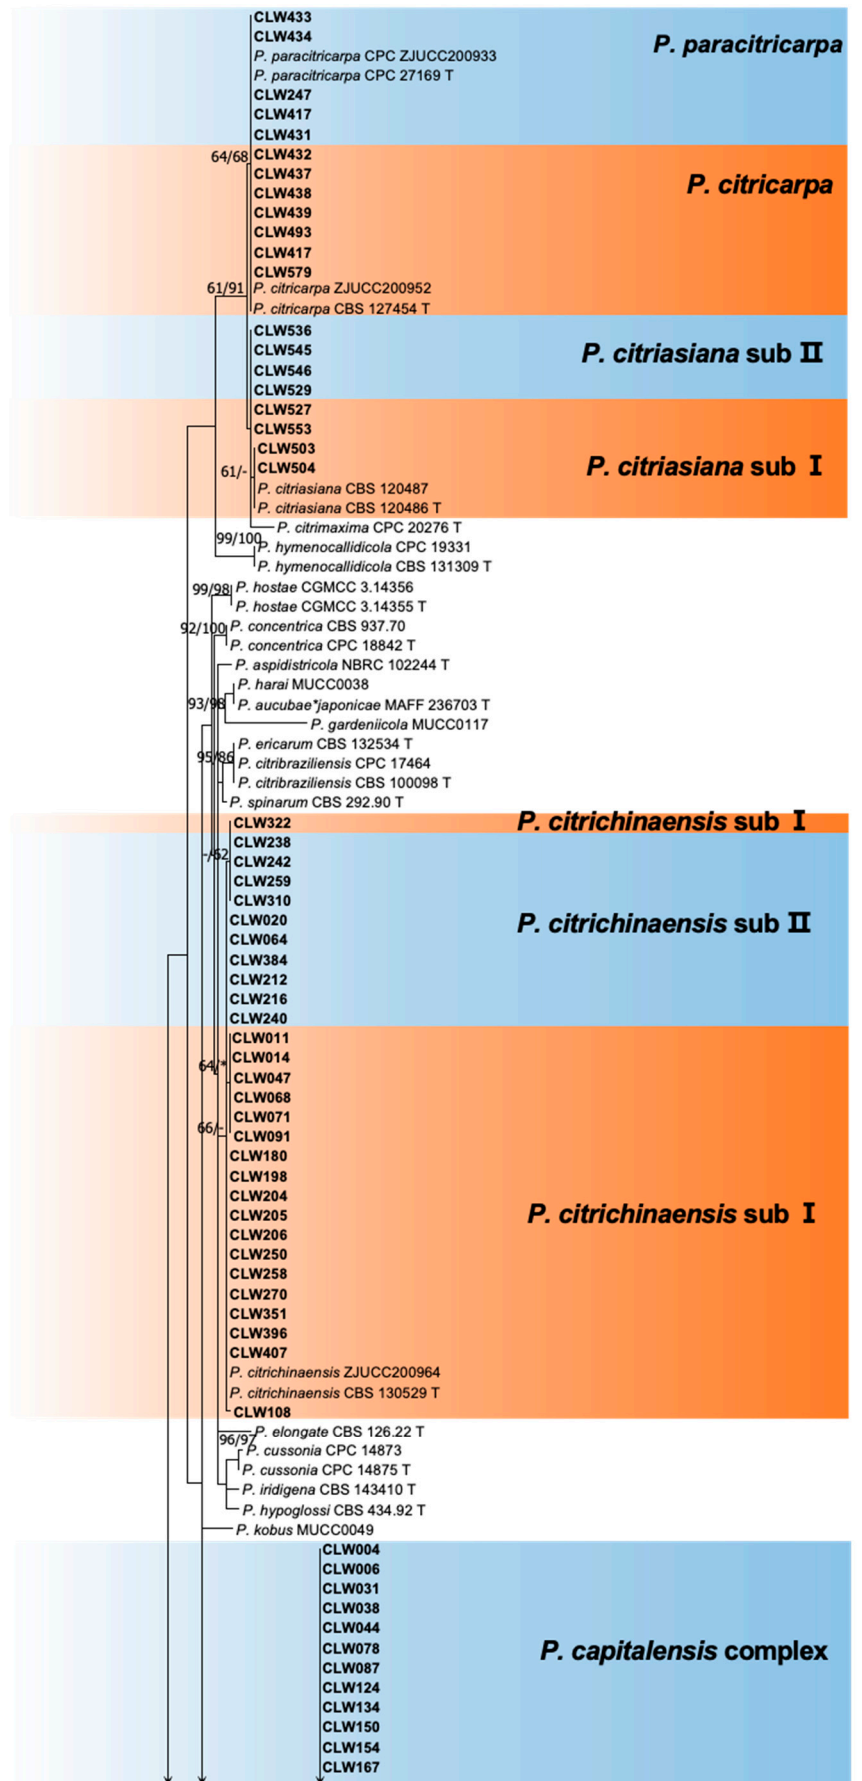

Next page continue.

Continue.

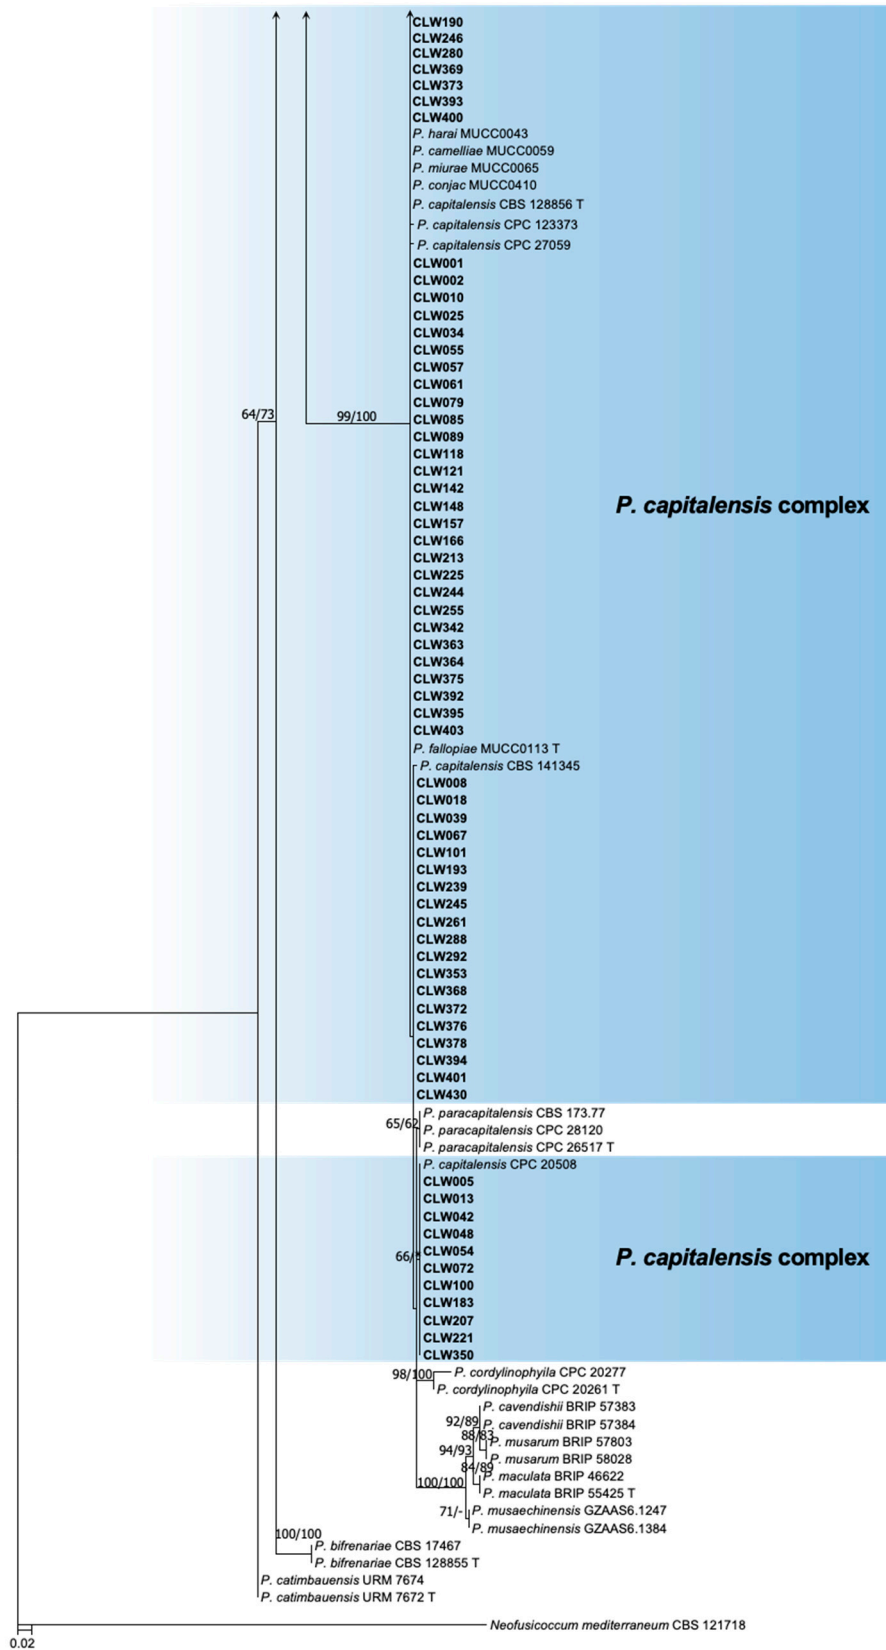

Figure S3. Maximum likelihood phylogeny of *Phyllostica* isolates related to citrus. 183 isolates of *actA* tree.

*tef1*

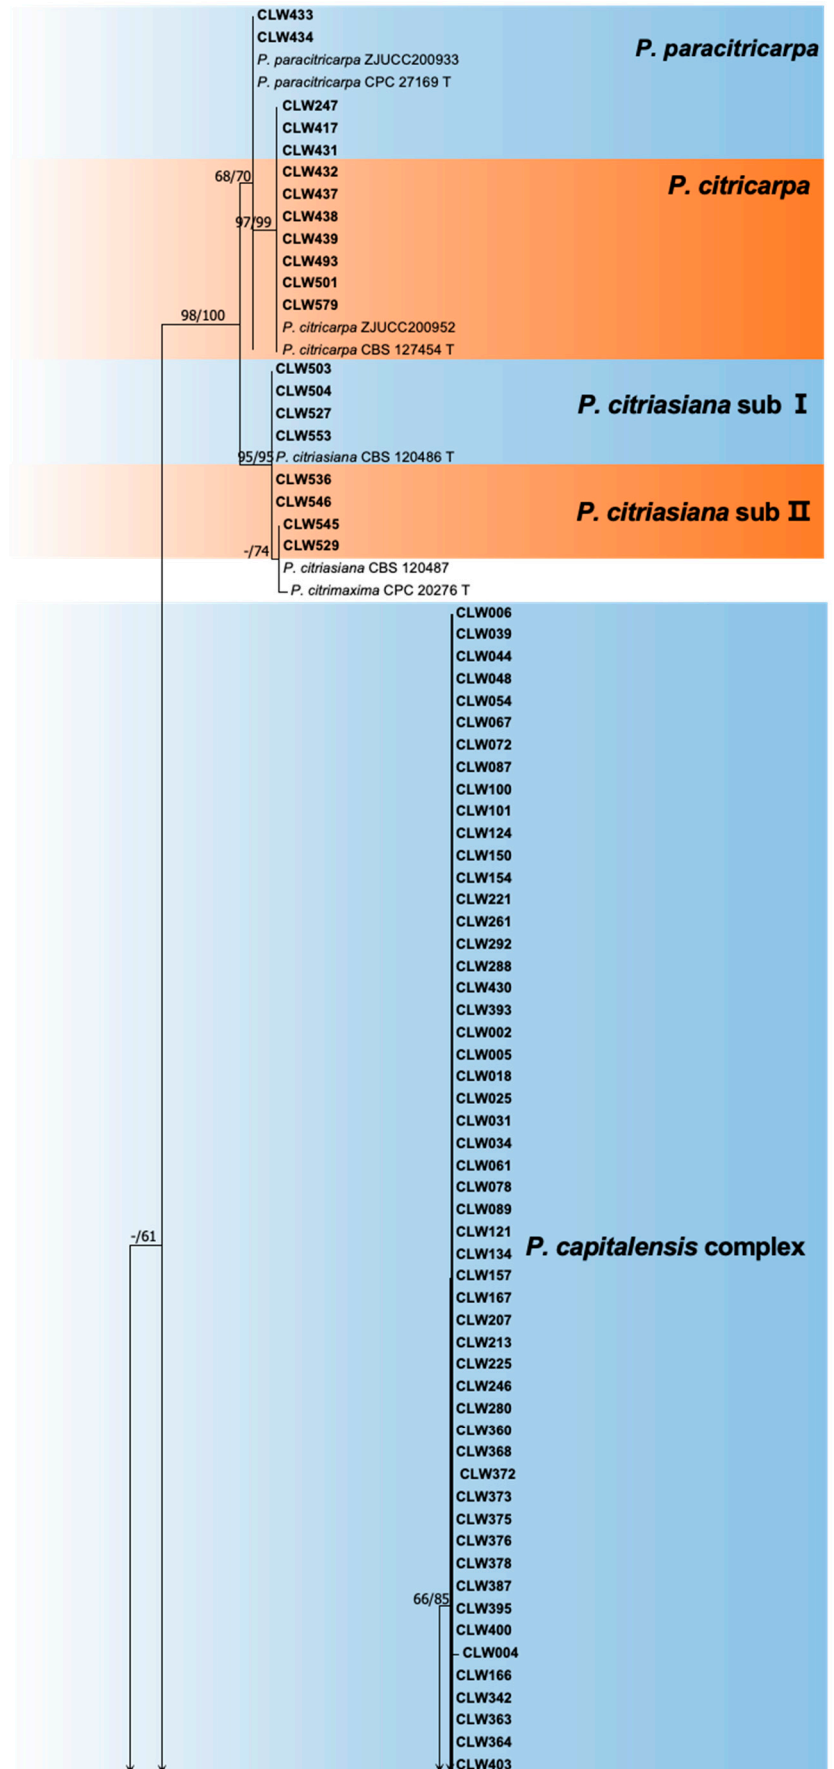

Next page continue.

Continue.

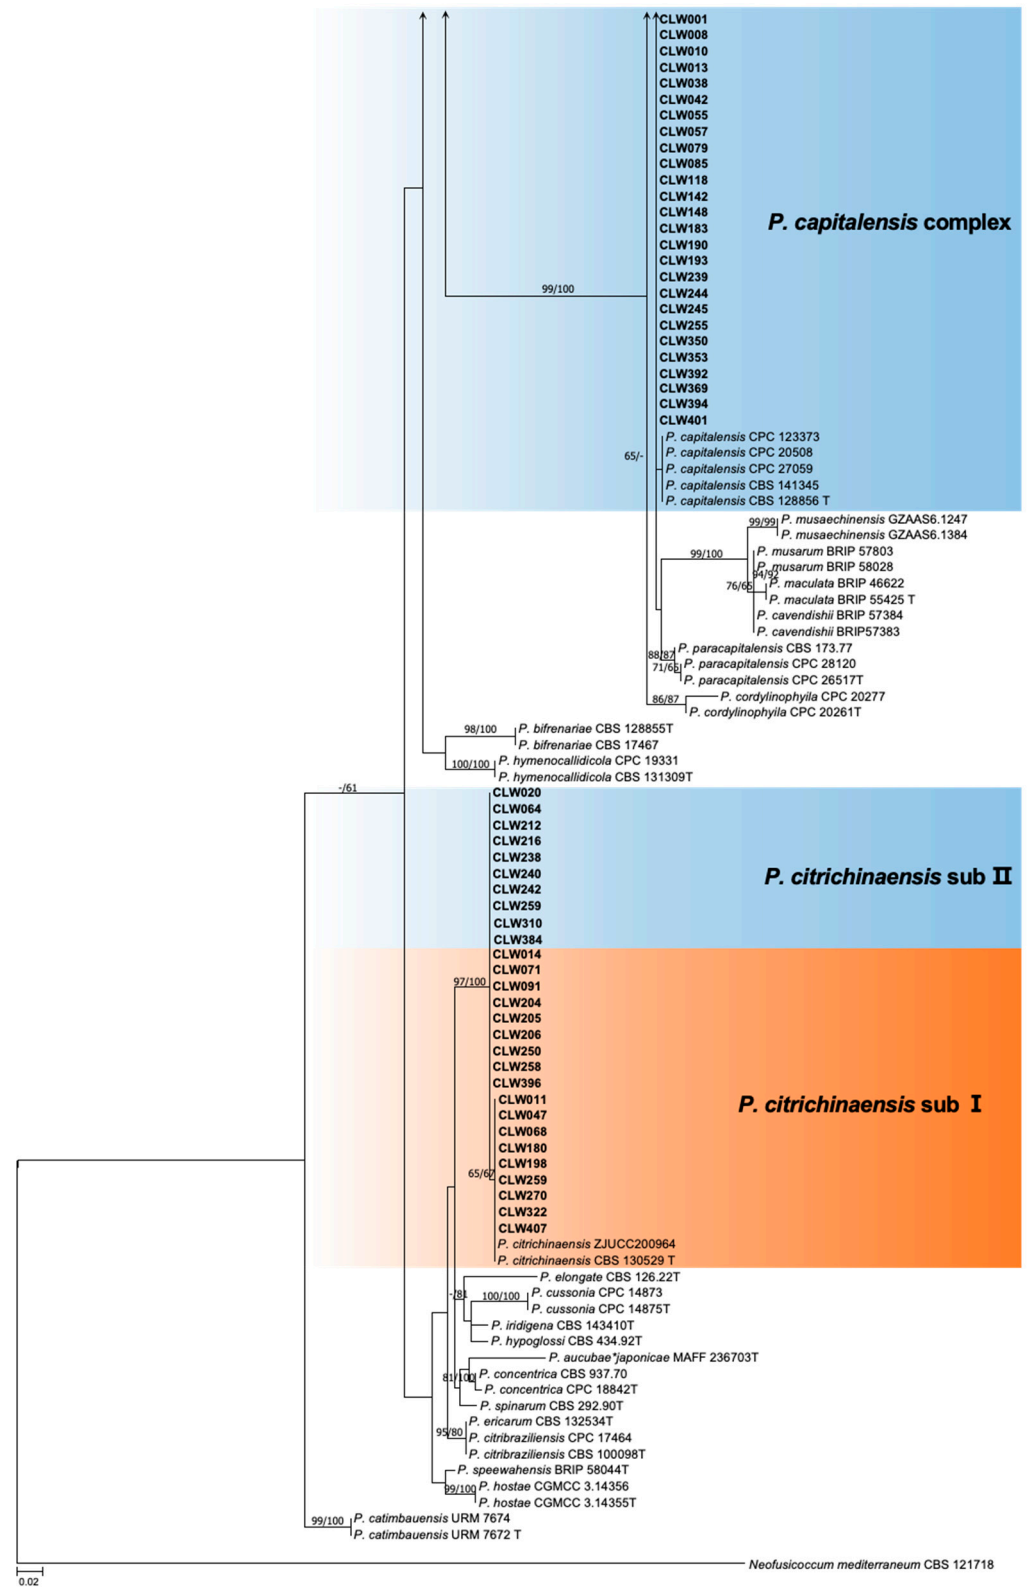

Figure S4. Maximum likelihood phylogeny of *Phyllostica* isolates related to citrus. 176 isolates of *tef1* tree.

gapdh

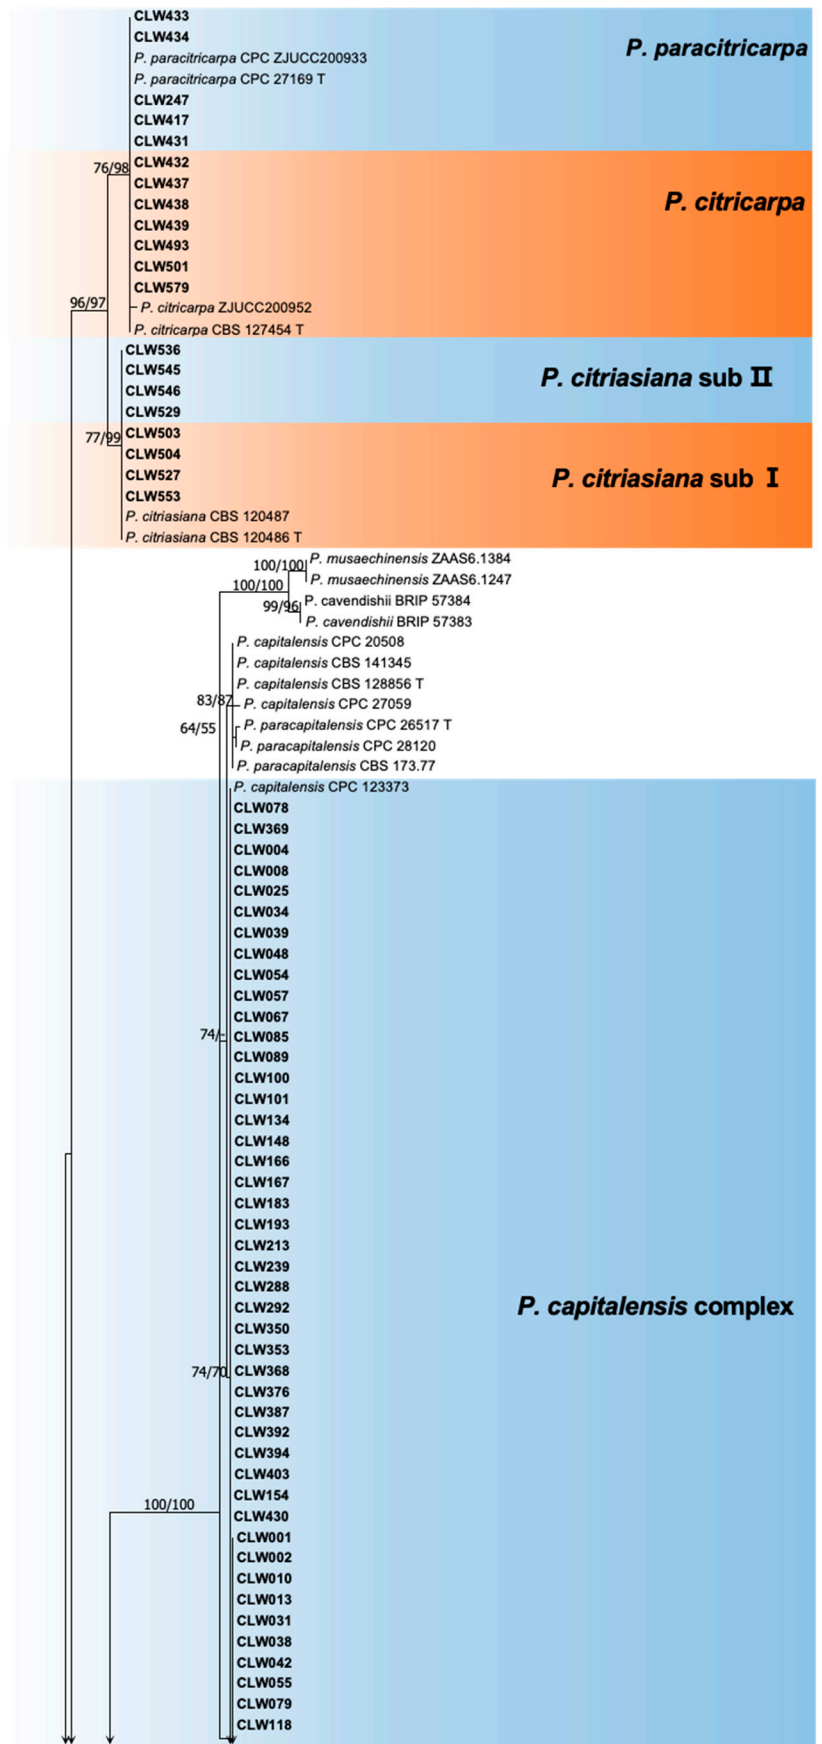

Next page continue.



Continue.

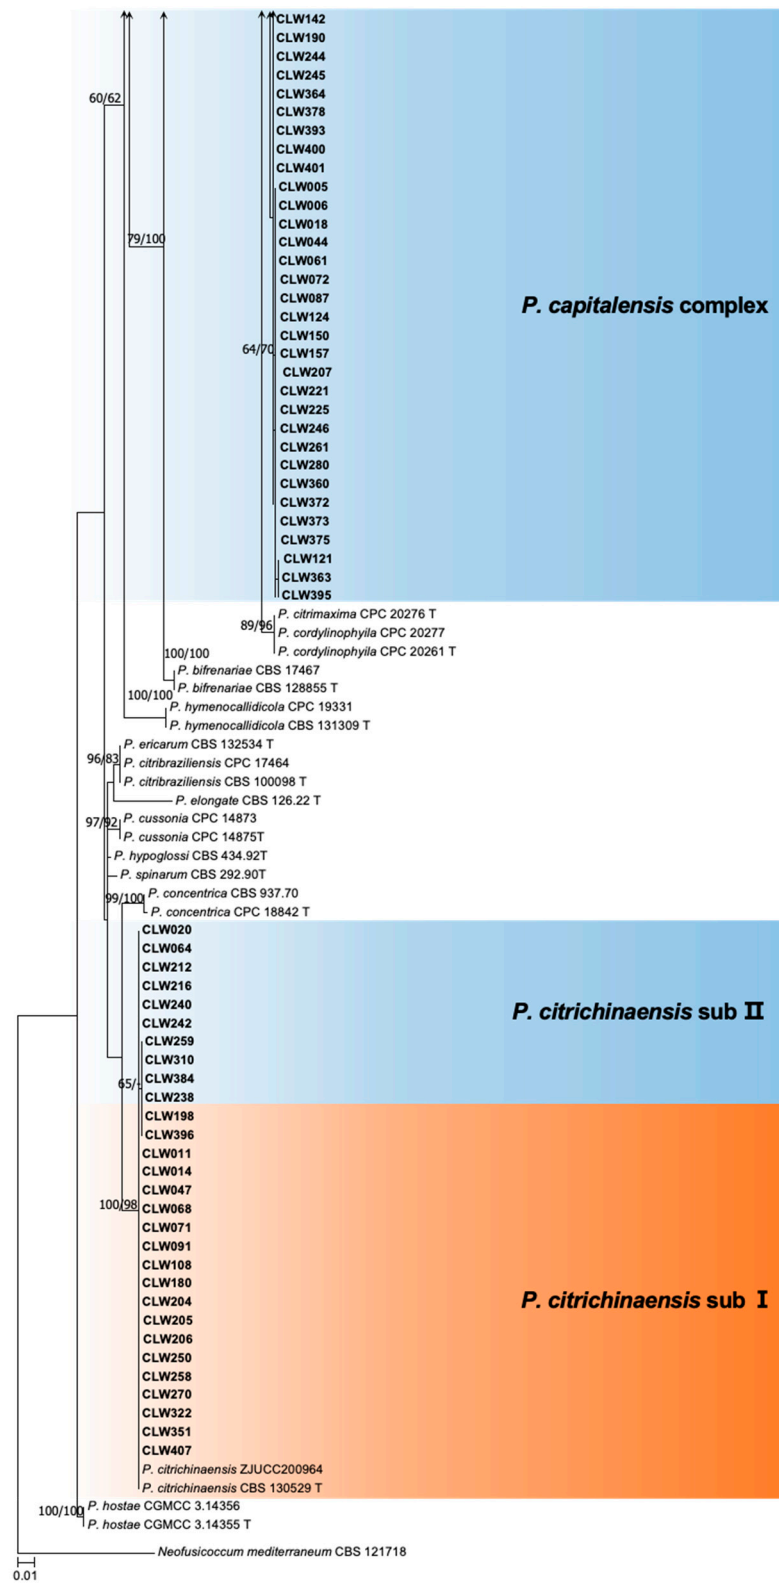

Figure S5 Maximum likelihood phylogeny of *Phyllosticta* isolates related to citrus. 166 isolates of *gapdh* tree.

LSU

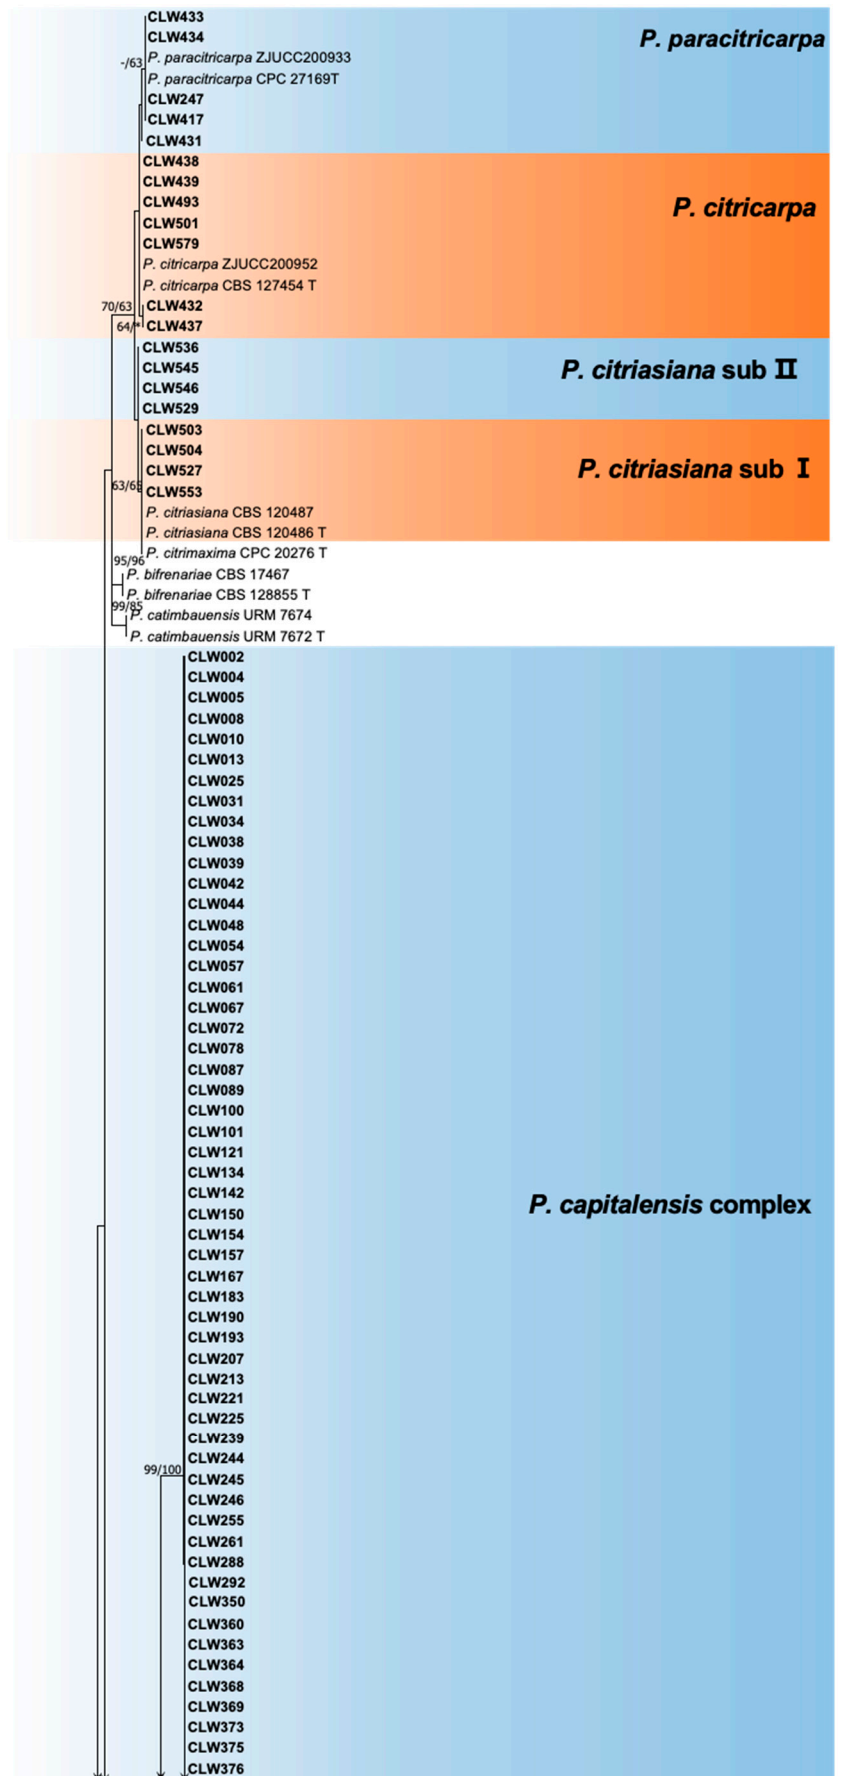

Next page continue.

Continue.

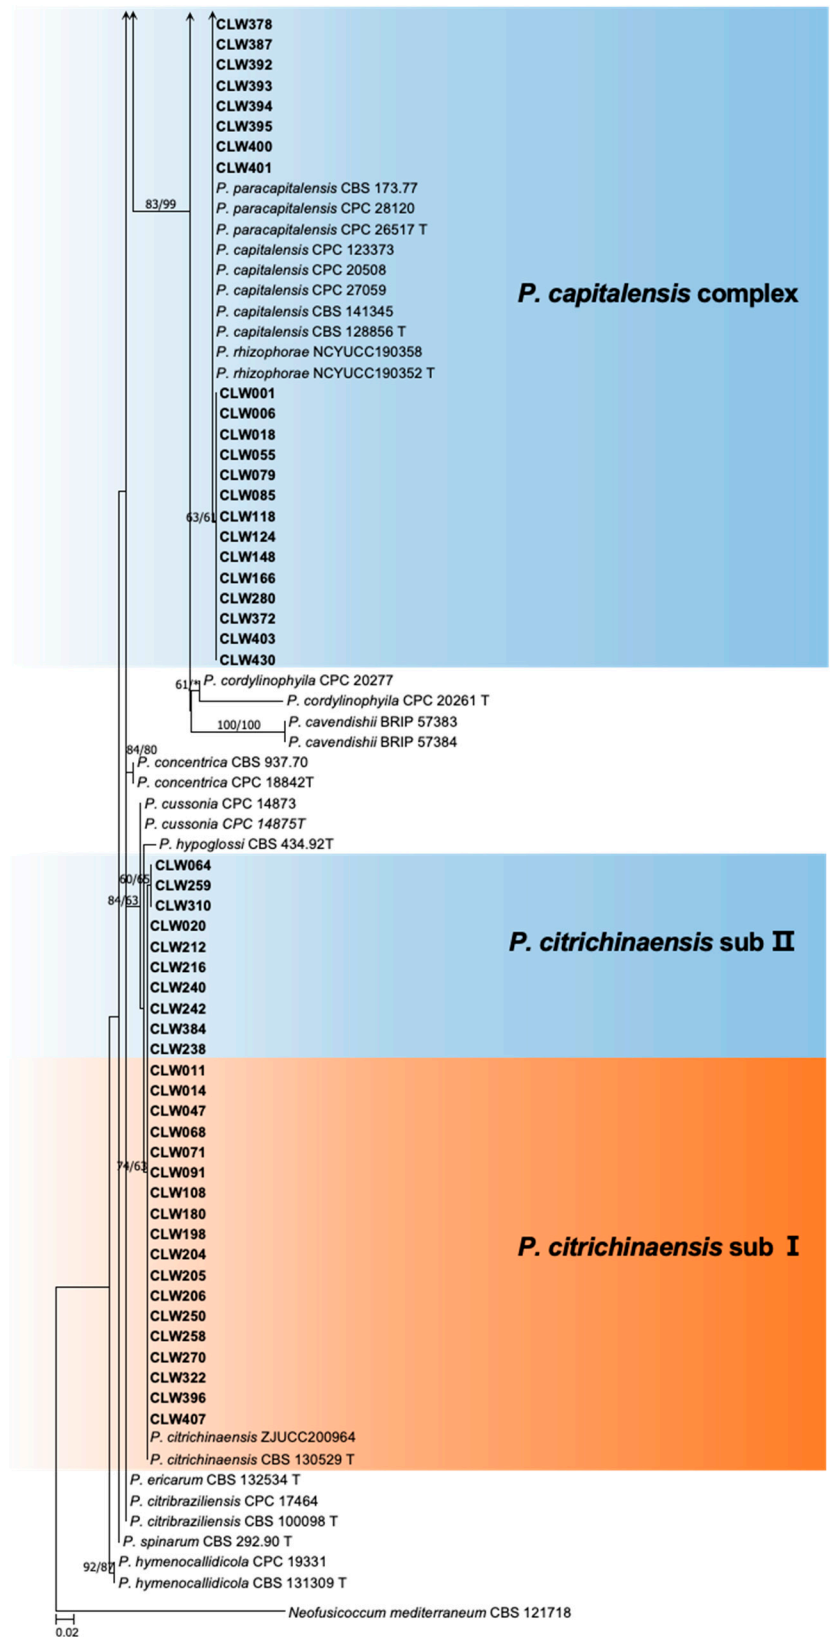

Figure S6 Maximum likelihood phylogeny of *Phyllostica* isolates related to citrus. 164 isolates of LSU tree.

*rpb2*

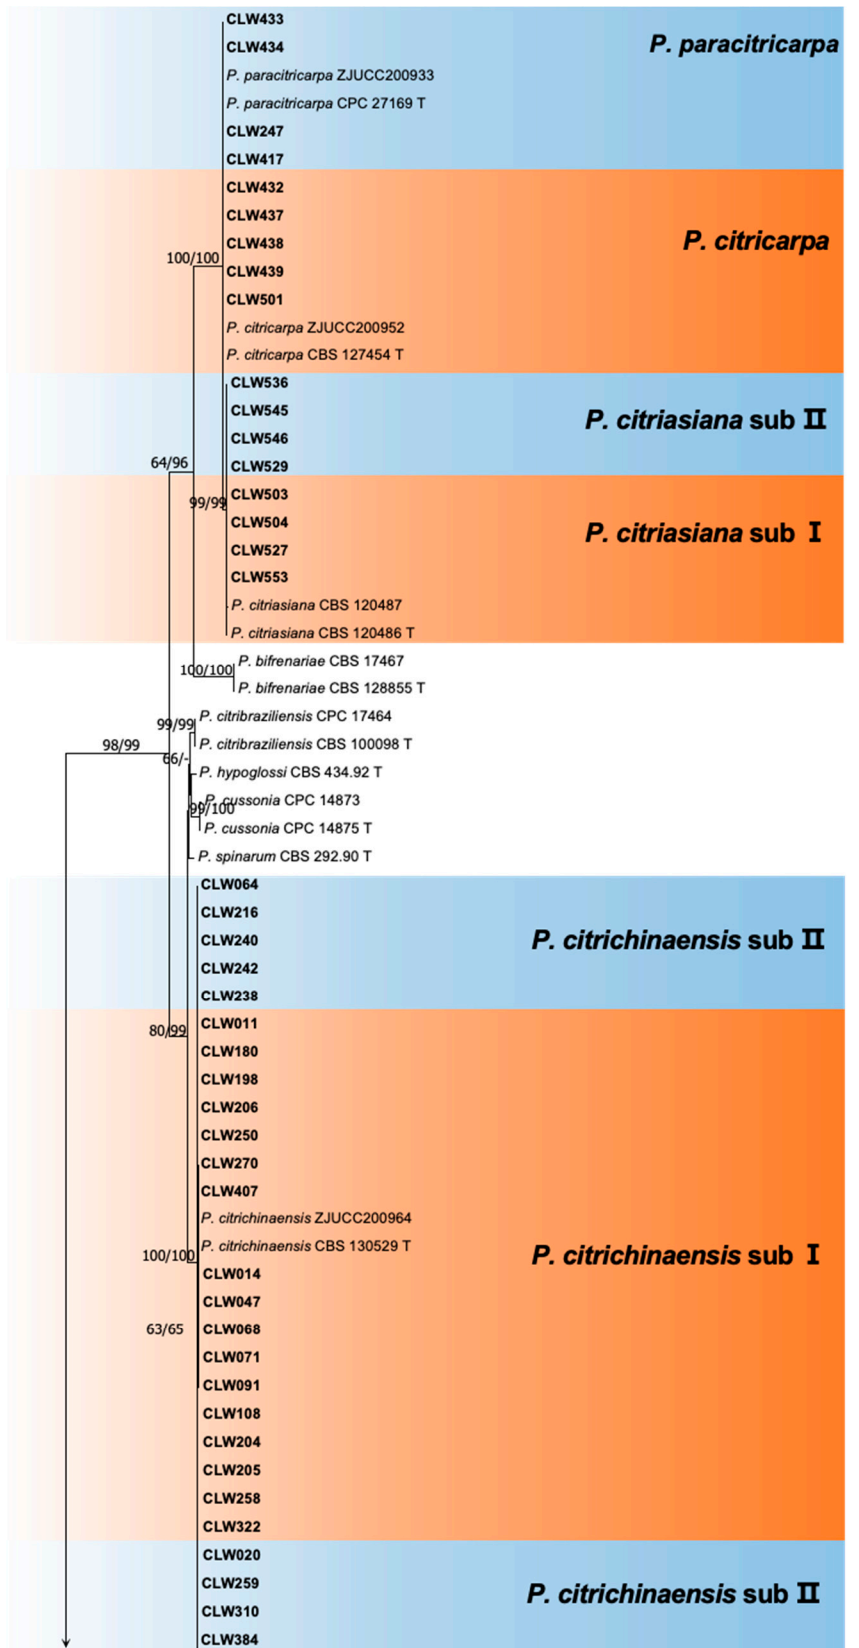

Next page continue.

Continue.

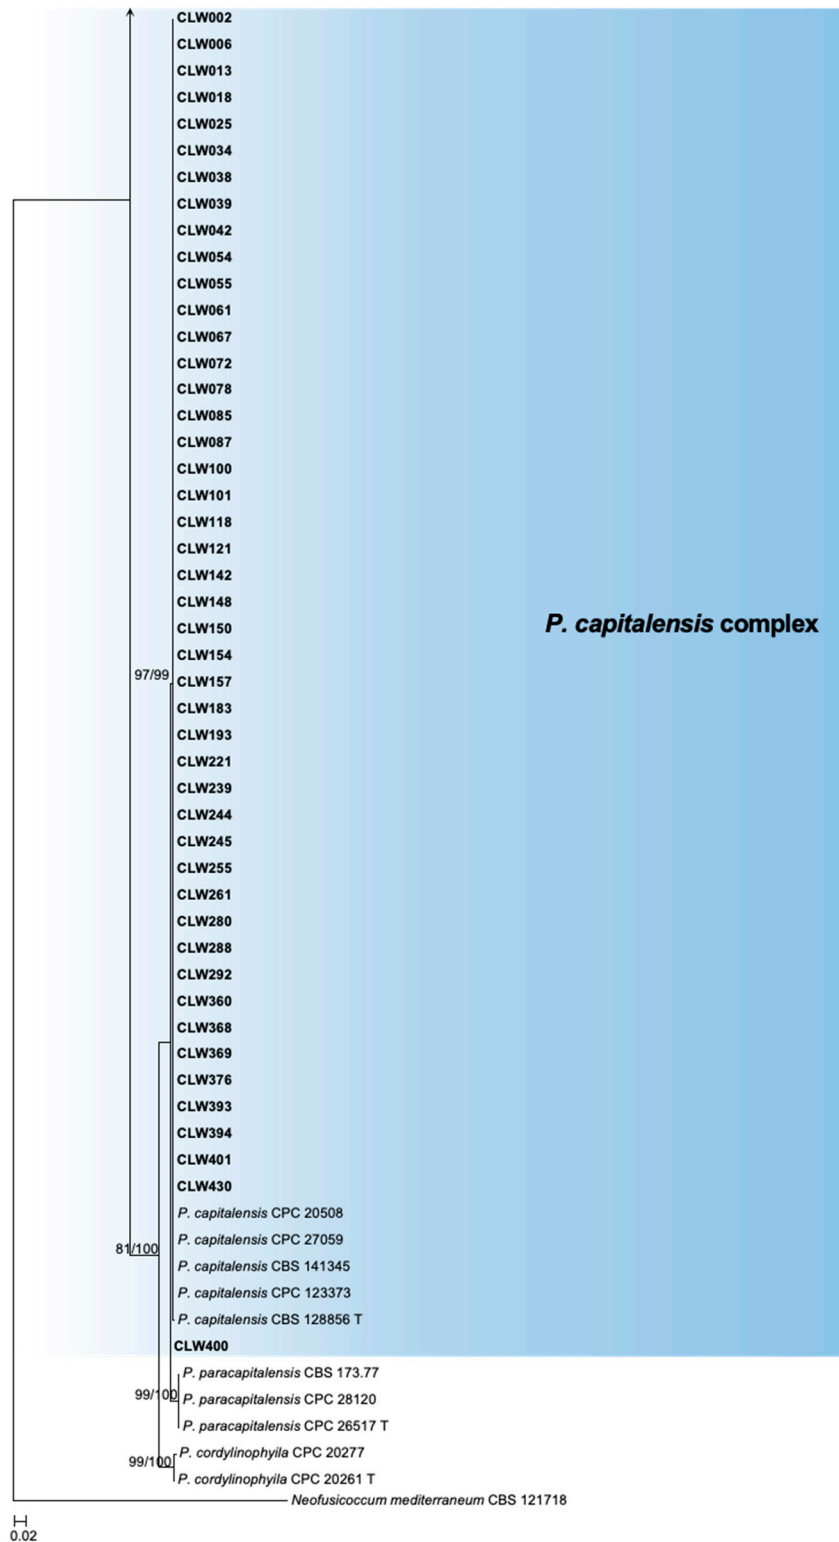

**Figure S7** Maximum likelihood phylogeny of *Phyllostica* isolates related to citrus. 116 isolates of *rpb2* tree. S1-S6, Isolates sequenced in this study are in bold. Bootstrap support values  $\geq 60\%$  for ML and MP are presented above branches as follows: ML/MP, bootstrap values  $< 60\%$  are marked

with '-', and absent are marked with '\*'. Ex-type isolates are marked with 'T'. The trees were rooted with *Neofusicoccum mediterraneum* (CBS 121718).

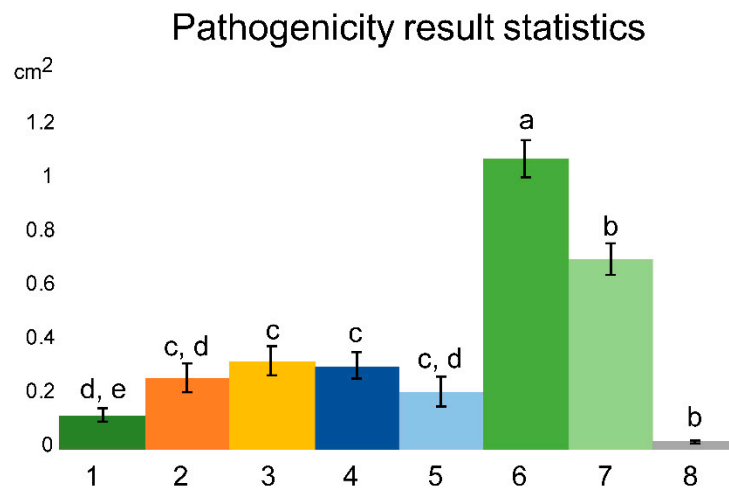

**Figure S8** Column chart indicating the average lesion area produced each isolate of *Phyllosticta* spp. Bar topped with different letters indicate treatment means that are significantly different ( $P = 0.05$ ). 1 to 7 represent average lesion area caused by isolates of *P. capitalensis*, *P. citriasiana* sub I & II, *P. citrichinaensis* sub I & II, *P. citricarpa* and *P. paracitricarpa*, 8 represent average lesion area caused by sterile water.
